# Supplementary material
Source: PubMed Central journal article supplement (PMC5330436)
Supplement: NIHMS71258-supplement-Supplement.pdf [file NIHMS71258-supplement-Supplement.pdf]

## The underestimated N-glycomes of lepidopteran species

Rhiannon Stanton, Alba Hykollari, Barbara Eckmair, Daniel Malzl, Martin Dragosits, Dieter Palmberger, Ping Wang, Iain B. H. Wilson and Katharina Paschinger

### Supplementary Data

**Scheme: Glycomic workflow employed in this study.** Summary of the Experimental Procedures indicating serial digestion with PNGase F then PNGase A followed by solid-phase extraction and labelling steps. Example glycans in the three different pools are shown; MALDI-TOF MS screening of PNGase A released pools resulted in detection of anionic glycans only in the High Five sample.

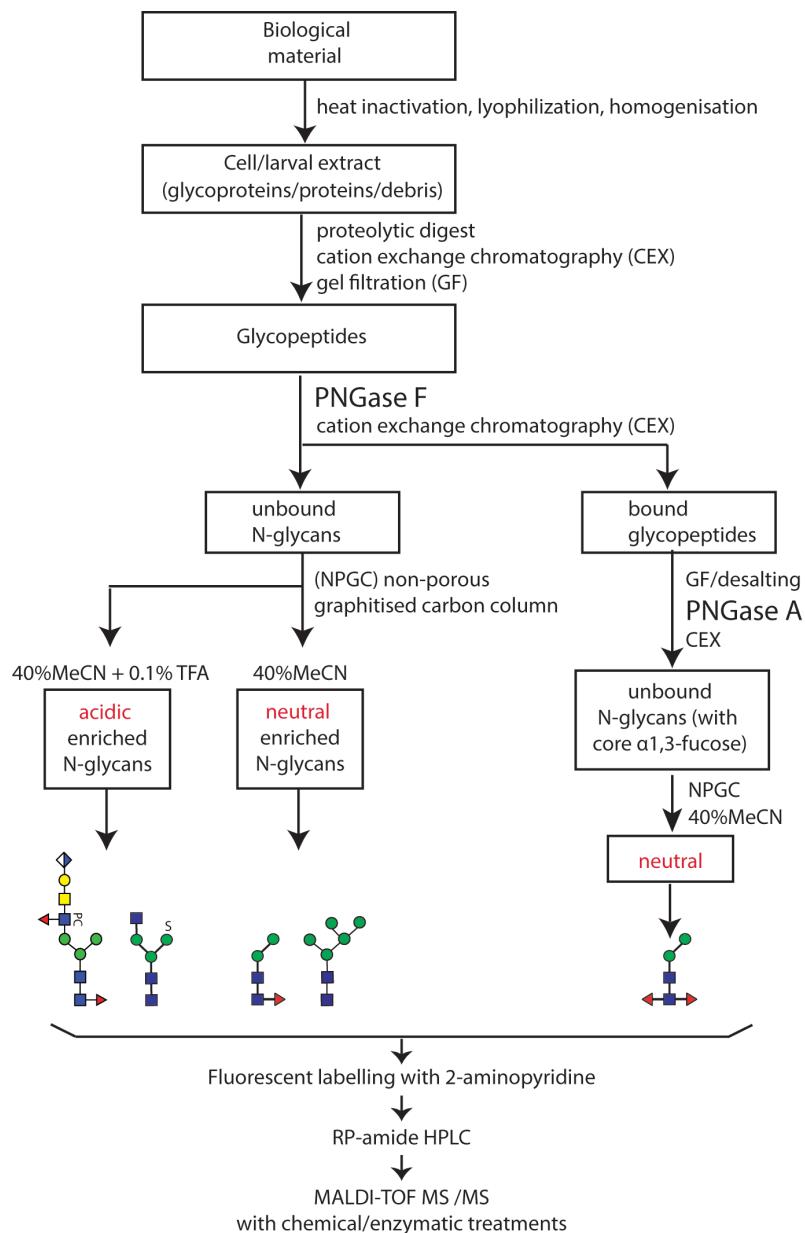

## Further information regarding the glycomic analyses

### ***Definition of the level of the glycan structural analysis***

The goal was the in-depth analysis of the N-glycomes of two lepidopteran species and one lepidopteran cell line. Thus individual glycan-containing HPLC fractions were subject to MALDI-TOF MS and MS/MS, a range of chemical and enzymatic treatments and (if appropriate) re-chromatography.

### ***Search parameters and acceptance criteria***

- a. **Peak lists:** As stated in the methods section: typically 1000 shots were summed for MS and 3000 for MS/MS. Spectra were processed with the manufacturer's software (Bruker Flexanalysis 3.3.80) using the SNAP algorithm with a signal/noise threshold of 6 for MS (unsmoothed) and 3 for MS/MS (four-times smoothed).
- b. **Search engine, database and fixed modifications:** All glycan data were manually interpreted and no search engine or database was employed; the fixed modification is the pyridylamine label at the reducing end.
- c. **Exclusion of known contaminants and threshold:** All glycan data were manually interpreted; only peaks with an MS/MS consistent with a pyridylaminated core chitobiose were included – the 'threshold' for inclusion was an interpretable MS/MS spectrum.
- d. **Enzyme specificity:** A description of the release methods (PNGase F followed by PNGase A) is given in the methods section. Enzymes used during the analysis (glycosyl hydrolases) are defined in the methods by species name and supplier. Citations for in-house purified recombinant enzymes are also given. As previous experience with normalizing glycosidase amounts based on units of activity towards *p*-nitrophenyl sugars reduced digestion efficiency, aliquots of glycans (equivalent to 5 – 50 mV in terms of fluorescence) were incubated with 0.2  $\mu$ l of the various enzyme preparations (whether commercial, desalted commercial or in-house produced) overnight (except for three hours in the case of FDL digests). These conditions result in no obvious unspecific removal of residues as defined by shifts in mass, MS/MS or retention times, although steric hindrance in some glycans leads to a requirement for longer incubation times (48 hours). Hydrofluoric acid treatment (3 $\mu$ l of 48% HF added to the dried glycan) was 24 or 48 hours on ice in the cold room prior to drying under vacuum; expected release of  $\alpha$ 1,3-fucose and phosphodiesteres, but not of other sugars or of sulphate, was observed under these conditions.
- e. **Isobaric/isomeric assignments:** For isomeric species, elution and/or digestion data were used for the assignment (as described in the text).

### ***Glycan or glycoconjugate identification***

- a. **Precursor charge and mass/charge (*m/z*):** All glycans detected were singly-charged and maximally two decimal places used for the *m/z* consistent with the accuracy of MALDI-TOF MS (see *Supplementary Table*); in the figures and due to space limitations, only one decimal place is indicated. For readability reasons, each individual *m/z* measurement in each sample is not listed in the *Supplementary Table*

(but refer to the individual Figures for example MS spectra), but previous data indicate an average +0.03 Da (+ 22 ppm) deviation between the measured and the calculated  $m/z$  values on the instrument used.

- b. **All assignments:** A listing of all compositions is given (*Supplementary Table*) for glycans released with either PNGase A or PNGase F. No glycans with core difucosylation (as judged by MS/MS) were detected in the PNGase F digests, consistent with the known specificity of this enzyme. For the glycans present in each pool, see the RP-amide-HPLC chromatograms (*Figures 1-3* and *Supplementary Figures 1-2*) annotated with structures shown according to the Standard Nomenclature for Glycans. Downwardly- and upwardly-drawn core fucose and mannose residues are respectively  $\alpha$ 1,3- and  $\alpha$ 1,6-linked.
- c. **Modifications observed:** Listed are the  $m/z$  values for glycans carrying a reducing terminal pyridylamine group (*Supplementary Table*). For the positive mode, the  $m/z$  values are for protonated forms; in the case of glycans detected in negative mode and carrying two sulphate residues, the  $m/z$  for sodiated adducts are shown. Depending on the glycan amount or presence of buffers in exoglycosidase preparations, the relative amounts of the  $H^+$ ,  $Na^+$ ,  $K^+$  and trace  $Cu^+$  adducts varied.
- d. **Number of assigned masses:** No glycan assignments were based on measured mass only; all assignments are based on at least MS/MS (examples are shown in the *Figures 4-9* and *Supplementary Figures 2-4*), in most cases corroborated by digest and elution data.
- e. **Spectra:** Representative annotated spectra (MS and MS/MS) defining structural elements are given in *Figures 4-9* and *Supplementary Figures 2-5*. In total, MS and/or MS/MS data for some 60 of the approximately 100 glycans are shown. The overall data is based on some 1500 MS and MS/MS spectra. Ten 'complete' MALDI-TOF MS spectra of pyridylaminated glycan pools, as well as a spectrum of an HPLC fraction containing  $Man_8GlcNAc_2$ , are also submitted in mzXML format, whereby both positive and negative mode spectra are included for the anionic pools.
- f. **Structural assignments:** As noted in the results section, the typical oligomannosidic structures are assigned based on elution time and fragmentation pattern; it is otherwise assumed that the glycans contain a trimannosyl core consistent with typical eukaryotic N-glycan biosynthesis. MALDI-TOF MS of oligomannosidic glycans shows no evidence for significant in-source fragmentation under the employed analysis conditions (see *Supplementary Figure 3* and  $Man_8GlcNAc_2$  mzXML file). The assignments of antennal and core fucose residues are based on RP-HPLC retention time, fragmentation pattern and/or susceptibility to digestions. Other antennal modifications (e.g., fucose, galactose, glucuronic acid and *N*-acetylgalactosamine; including type of glycosidic linkage) are defined based on digestions and fragmentation patterns with rechromatography after digestion in some cases. There is no evidence of in-source fragmentation of either neutral terminal monosaccharides (including Lewis-type fucosylation), phosphorylcholine or glucuronic acid (as evidenced by this and previous publications). The definition of sulphate is based on detection in negative ion mode, in-source loss in positive ion mode, resistance to hydrofluoric acid (as compared to isobaric phosphate), non-digestion of the underlying residue and (as appropriate) co-elution with structures from mosquito shown to be partially sensitive to solvolysis with methanolic HCl.

**Supplementary Figure 1: PNGase A-digests of *T. ni* and *L. dispar* larvae.** RP-amide chromatograms of the pyridylaminated N-glycans of lepidopteran larvae resulting from PNGase A digestion of glycopeptides remaining after a PNGase F digest are annotated with proposed structures and the glucose units. The dominant glycans in these preparations represent residual oligosaccharides which were not released by PNGase F despite the lack of core  $\alpha$ 1,3-fucose; thereby, core  $\alpha$ 1,3-fucosylated and  $\alpha$ 1,3/6-difucosylated glycans are present in low amounts (see inset in lower panel for relevant linkage annotations).

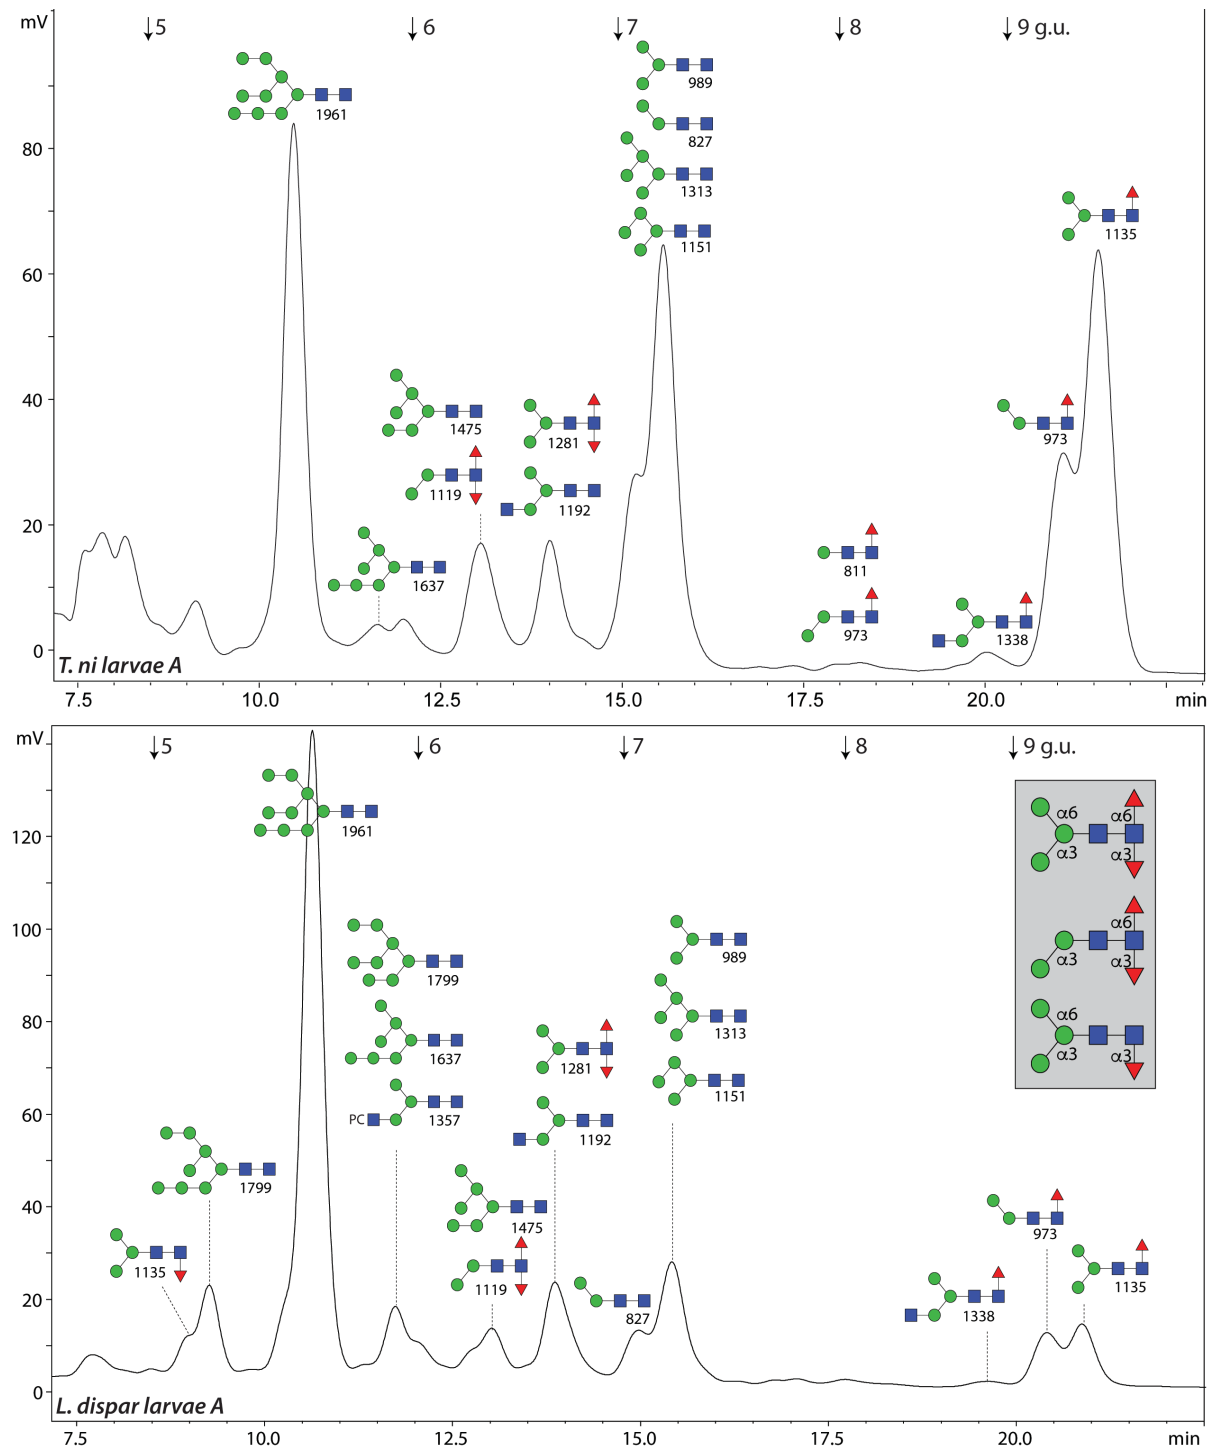

**Supplementary Figure 2: Neutral PNGase A-released glycans from High Five cells.** (A) RP-amide chromatogram of the pyridylaminated N-glycans of *T. ni* High Five cells resulting from PNGase A digestion of glycopeptides (which remained after PNGase F digestion) are annotated with proposed structures and the glucose units (g.u.). (B-G) Positive mode MALDI-TOF MS of three fractions before and after diagnostic  $\alpha$ 1,6-mannosidase or FDL  $\beta$ -hexosaminidase treatment. (H-M) Positive mode MALDI-TOF MS/MS of core  $\alpha$ 1,3-fucosylated and  $\alpha$ 1,3/6-difucosylated glycans (only protonated forms were fragmented despite the high abundance of sodiated adducts in the FDL digest); characteristic for mono- and difucosylation of pyridylaminated glycans are the  $m/z$  446 and 592 Y1 fragment ions. The inset in A shows the result of anti-HRP Western blotting and Ponceau S staining of three *T. ni* cell lines as well as of Sf9 cells; the low anti-HRP staining of Sf9 extracts is in accordance with previous data indicating minimal core  $\alpha$ 1,3-fucosylation in this cell line.

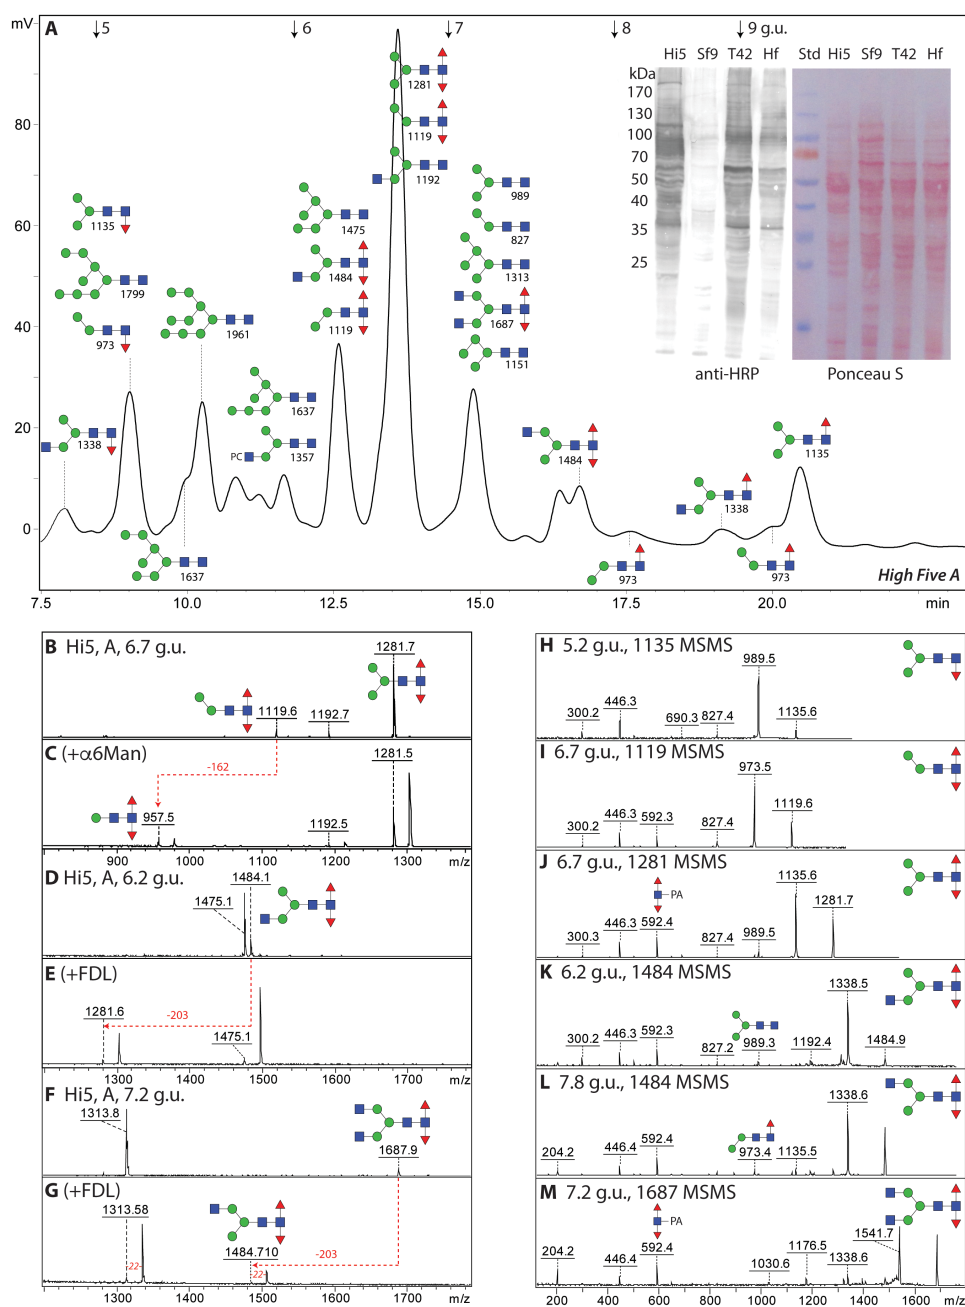

**Supplementary Figure 3: Selected mass spectra of *L. dispar* neutral PNGase F-released HPLC-fractionated N-glycans with or without exoglycosidase treatments.** The depicted MALDI-TOF MS spectra represent the ‘full’ data for parts of Figures 4 and 5 from the main text; the major structures are annotated with  $m/z$  values of the  $[M+H]^+$  ions, in some cases also other adducts with sodium (+22), potassium (+38) or copper (+62/+64), as based on retention time and fragmentation data. Panels A and B are spectra of major oligomannosidic fractions and indicate that in source dissociation is absent in the case of  $\text{Man}_{7,8,9}\text{GlcNAc}_2$  (see also mzXML file for  $\text{Man}_8\text{GlcNAc}_2$ ). Panels C and D are fuller-range depictions of the MS spectra in Figure 4 G and H in the main text (refer to Figure 4 S-X for MS/MS spectra of selection ions before and after *Aspergillus*  $\alpha 1,2$ -mannosidase digestion). Panels E, F, G and H are fuller-range depictions of the MS spectra in Figure 5 A, B, D and F in the main text (zoomed-in sections of the spectra are also shown to highlight the effects of almond  $\alpha 1,3/4$ -fucosidase on the glycans containing antennal Lewis-like fucose modifications – see also changes in MS/MS patterns in Figure 5 of the main text); no evidence of unspecific removal of core  $\alpha 1,6$ -fucose of the co-eluting  $m/z$  1503 structure ( $m/z$  1541/1565 as  $[M+K]^+/[M+Cu]^+$ ) was observed, but some shift towards sodiated adducts occurred. Panels I and J depict MS spectra of the two neighbouring 9.5 and 10.5 g.u. fractions (hence some overlap in the contained structures); panel J is a fuller-range spectrum of that shown in Figure 5 C.

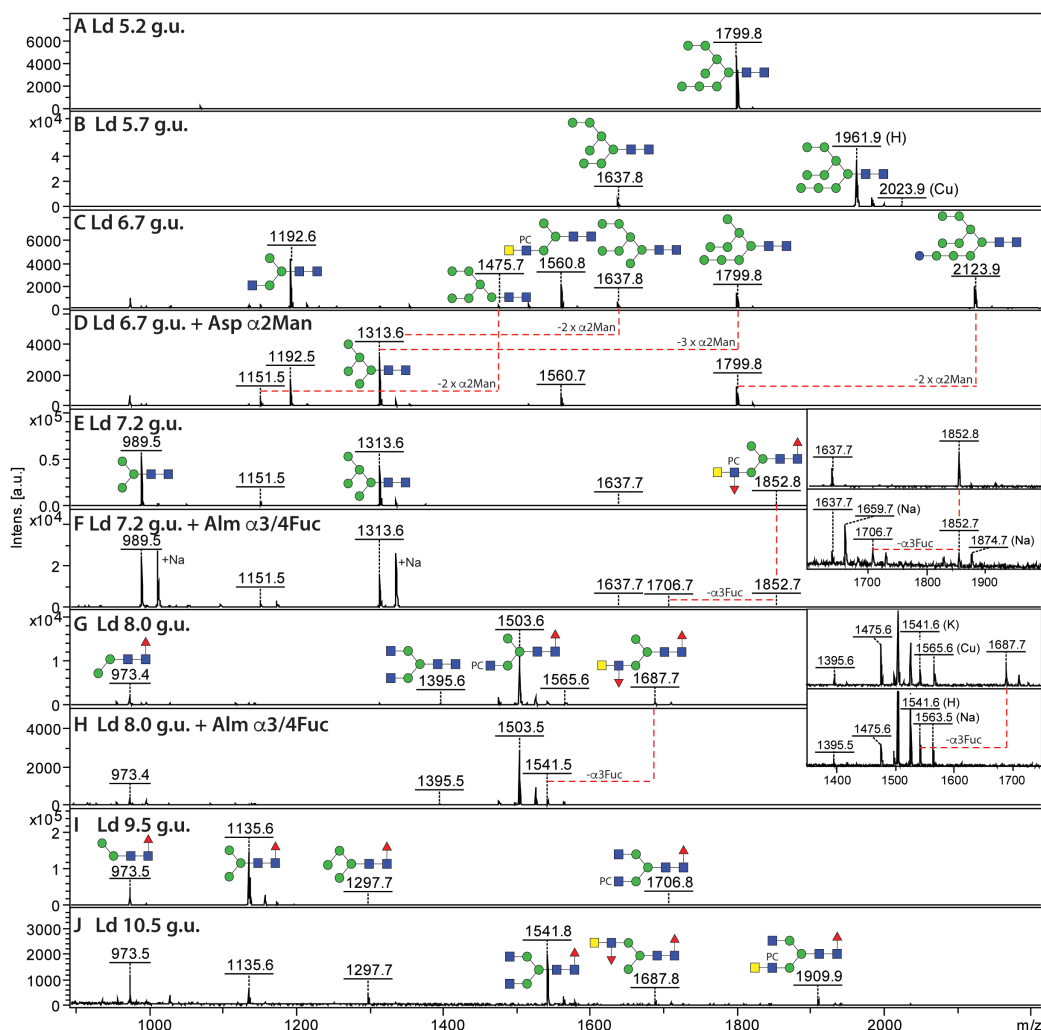

**Supplementary Figure 4: Characterisation of neutral and zwitterionic antennal modifications of *L. dispar* and *T. ni* glycans.** (A-C) MS/MS spectra of Gal<sub>1</sub>Man<sub>3</sub>GlcNAc<sub>3</sub>Fuc<sub>1</sub> (*m/z* 1500) before and after specific *Xanthomonas* α1,2/3-mannosidase or *Xanthomonas* β1,3-galactosidase treatment; this isomer eluting at 11.5 g.u. is distinct from the Man<sub>4</sub>GlcNAc<sub>3</sub>Fuc<sub>1</sub> glycan eluting at 8.4 g.u. (see Figure 4 D and Q). (D and E) MS/MS of two isomers of Hex<sub>3</sub>HexNAc<sub>5</sub>Fuc<sub>1</sub> (*m/z* 1744) of different elution times isolated from *T. ni* larvae, whereby the B ion of *m/z* 407 is diagnostic for a HexdiNAc motif; the elution time of the triantennary glycan corresponds to that of one from mosquito run on the same column (13.5 g.u.), but contrasts with an isomer with a putative upper arm β1,6-GlcNAc as found in nematodes (elution at 8.2 g.u.). (F) Western blotting of three *T. ni* cell lines as well as Sf9 cells with the murine TEPC15 antibody and human C-reactive protein, which both recognise phosphorylcholine; protein loading was similar as judged by Ponceau S staining (see inset in Supplementary Figure 2A). (G and H) MS/MS of two further isomers of Hex<sub>3</sub>HexNAc<sub>4</sub>Fuc<sub>1</sub>PC<sub>1</sub> (*m/z* 1706) with a biantennary or ‘upper arm’ pseudohybrid structure; (I-K) MS/MS of Hex<sub>3</sub>-<sub>4</sub>HexNAc<sub>4-5</sub>Fuc<sub>1</sub>PC<sub>1-2</sub> glycans; (L) MS/MS of Hex<sub>3</sub>HexNAc<sub>6</sub>Fuc<sub>1</sub>PC<sub>2</sub> (*m/z* 2278) before and after (see inset) *C. elegans* HEX-4 β-*N*-acetylgalactosaminidase treatment, thereby verifying the presence of two unsubstituted terminal GalNAc residues. Key B-fragments are annotated with structures and selected losses yielding Y-fragments are also indicated.

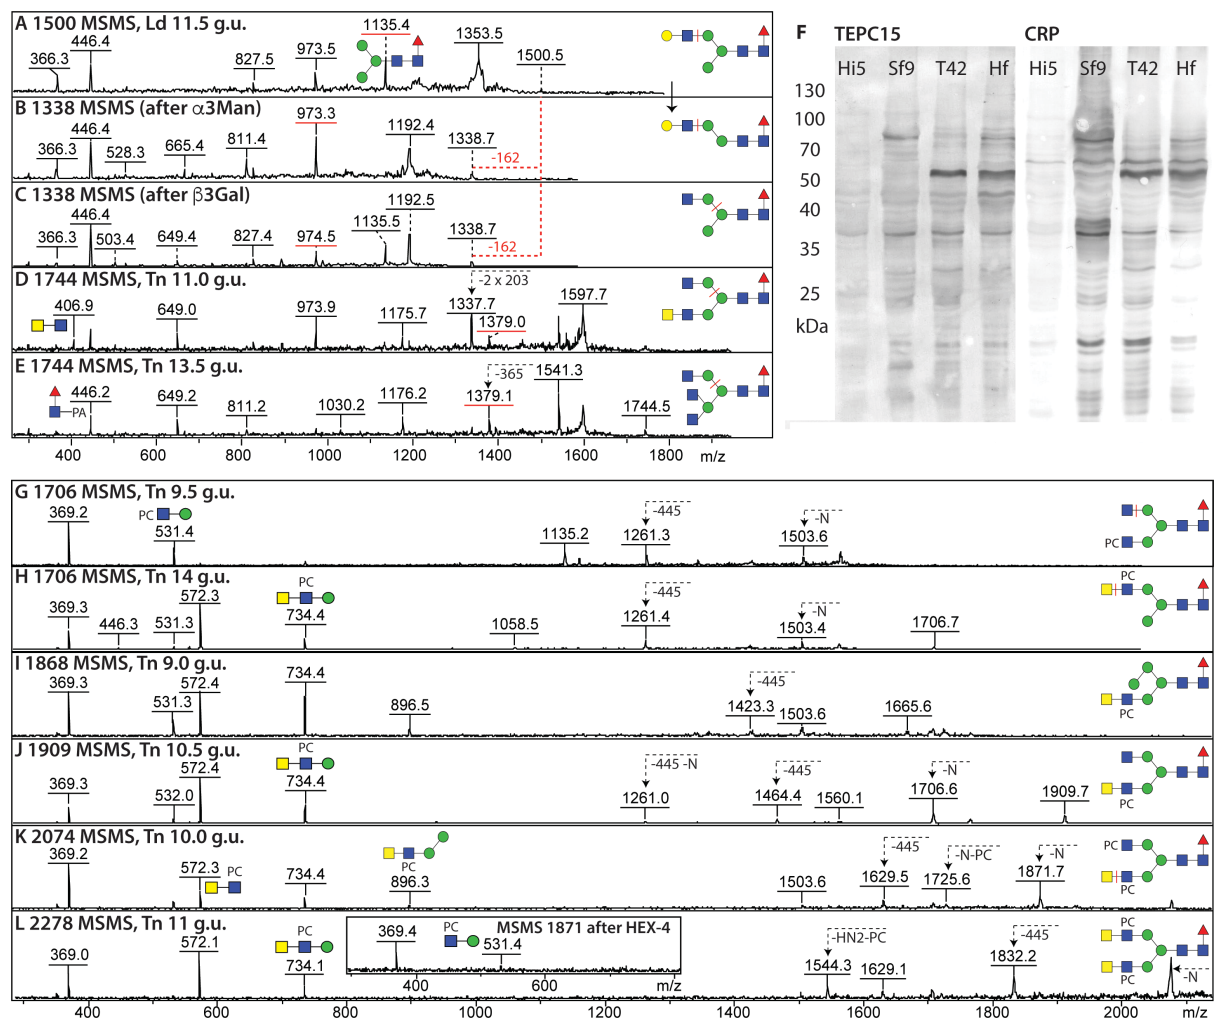

**Supplementary Figure 5: RP-amide HPLC and MALDI-TOF-MS analysis of *L. dispar* sulphated glycans before and after glycosidase digestion. (A)** Digestion of the 7.5 g.u. anionic fraction (solid arrow) with *Xanthomonas*  $\alpha$ 1,2/3-mannosidase resulted in shifts to higher retention time (only ~90% due to steric effect in case of  $m/z$  1416); subsequent bovine  $\alpha$ -fucosidase then resulted in a lower retention time reflecting shifts in  $m/z$  as judged by negative (B-D) and positive (E-G) MALDI-TOF MS. The original sulphated glycans are indicated on the chromatogram in grey and the digestion products as well as the mannosidase-resistant  $m/z$  2042 glycan (see also **Figure 8 M** and **Figure 9 F and G** in the main text) in colour.

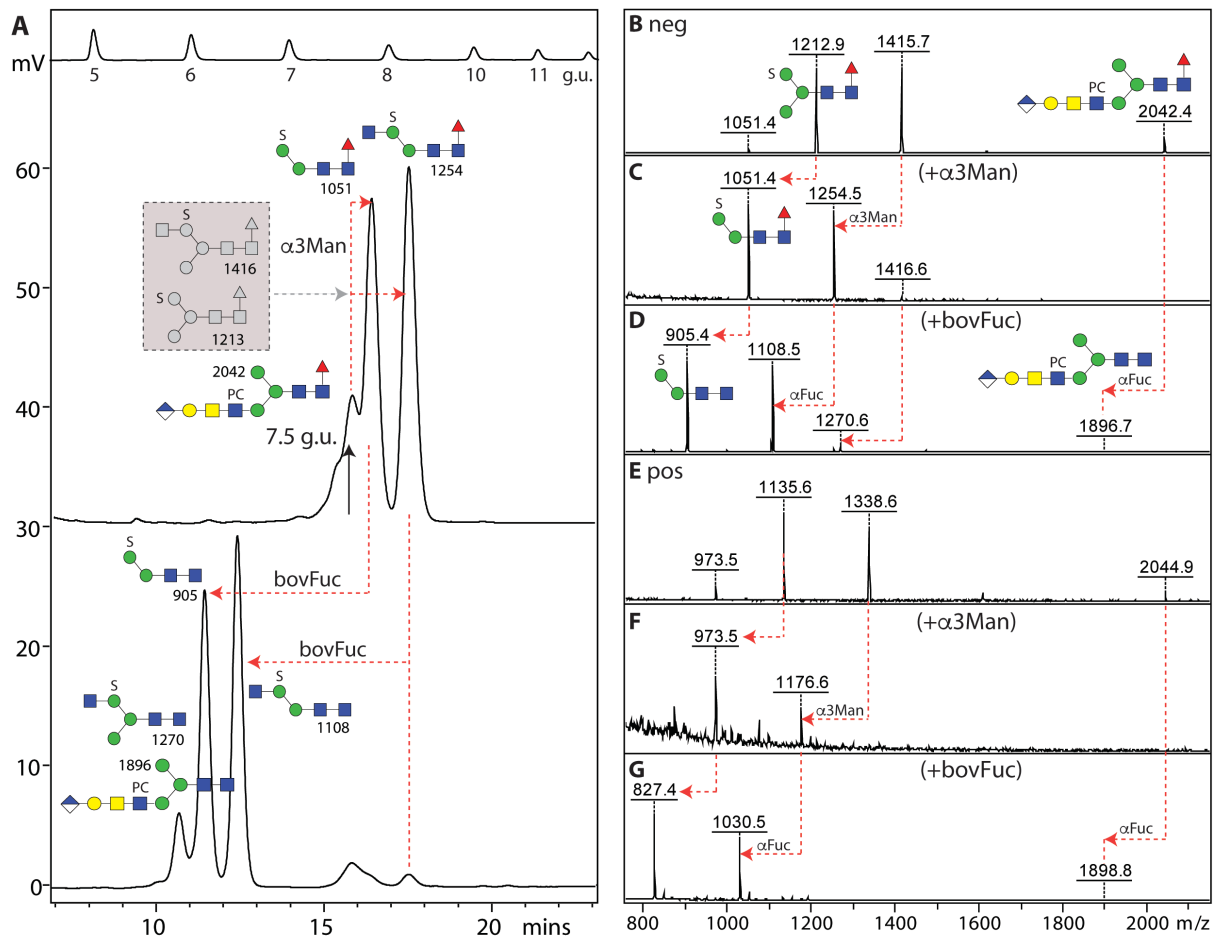



**Supplementary Figure 6: Anionic High Five PNGase A-released glycans.** An aliquot of PNGase A-released N-glycans was pyridylaminated without prior solid phase extraction. This revealed at peak eluting at 6 g.u. containing three glycans with core difucosylation and hexose-linked sulphate. This fraction was subject to treatment with either bovine  $\alpha$ -fucosidase (removal of  $\alpha$ 1,6-fucose) or hydrofluoric acid (removal of  $\alpha$ 1,3-fucose) leading to shifts in retention time (note that different chromatogram windows are shown) as well as  $m/z$  (see panels on upper right); original and product glycans are annotated together with the relevant positive or negative mode  $m/z$  value (bold in the case of negative ions). The relevant negative mode MS/MS of the original  $m/z$  1359 and 1562 glycans as well as the  $m/z$  1213 and 1416 HF products demonstrate sulphation of the core trimannosyl region (panels on lower right).

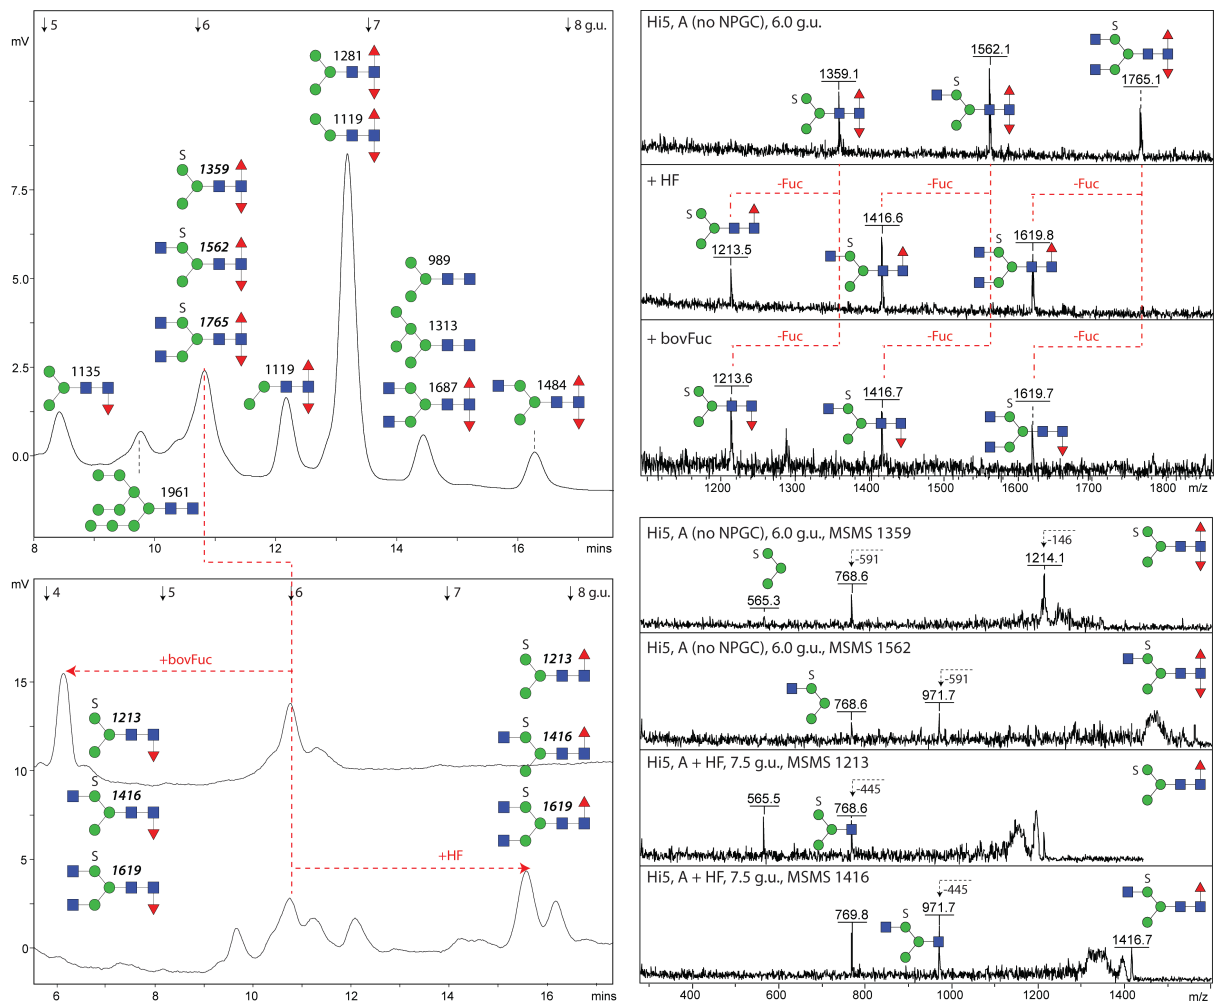

**Supplementary Table. Compositions and theoretical  $m/z$  values for pyridylaminated lepidopteran N-glycans.** The ninety different compositions are of the form  $H_xN_yF_{1-2}PC_{0-2}GlcA_{0-1}S_{0-2}$  (i.e.,  $Hex_xHexNAc_yFuc_{1-2}PC_{0-2}GlcA_{0-1}S_{0-2}$ , shown as, e.g., H4N5FPCGlcAS, whereby PC and S are the abbreviations for phosphorylcholine and sulphate), but do not take account of isomers; single fucose, PC, glucuronic acid or sulphate modifications are given without a number. The presence of a particular glycan mass in a sample is indicated by a tick. Theoretical  $m/z$  were calculated by Glycoworkbench; generally the observed values (refer to individual spectra) are within 0.2 mass units.

| Composition | [M+H] <sup>+</sup> | [M-H] <sup>-</sup> | [M-2H+Na] <sup>-</sup> | <i>T. ni</i> | Hi 5 | <i>L. dispar</i> |
|-------------|--------------------|--------------------|------------------------|--------------|------|------------------|
| H1N2F       | 811.34             |                    |                        | ✓            | ✓    | ✓                |
| H2N2        | 827.34             |                    |                        | ✓            | ✓    | ✓                |
| H2N2S       |                    | 905.28             |                        | ✓            | ✓    | ✓                |
| H2N2F       | 973.39             |                    |                        | ✓            | ✓    | ✓                |
| H3N2        | 989.39             |                    |                        | ✓            | ✓    | ✓                |
| H2N2FS      |                    | 1051.34            |                        | ✓            | ✓    | ✓                |
| H3N2S       |                    | 1067.33            |                        | ✓            | ✓    | ✓                |
| H2N3S       |                    | 1108.36            |                        | ✓            | ✓    |                  |
| H2N2F2      | 1119.46            |                    |                        | ✓            | ✓    | ✓                |
| H3N2F       | 1135.45            |                    |                        | ✓            | ✓    | ✓                |
| H4N2        | 1151.45            |                    |                        | ✓            | ✓    | ✓                |
| H3N2S2      |                    |                    | 1169.27                | ✓            | ✓    | ✓                |
| H2N3F       | 1176.48            |                    |                        | ✓            | ✓    | ✓                |
| H3N3        | 1192.47            |                    |                        | ✓            | ✓    | ✓                |
| H3N2FS      |                    | 1213.39            |                        | ✓            | ✓    | ✓                |
| H2N3FS      |                    | 1254.42            |                        | ✓            | ✓    | ✓                |
| H3N3S       |                    | 1270.41            |                        | ✓            | ✓    | ✓                |
| H3N2F2      | 1281.51            |                    |                        | ✓            | ✓    | ✓                |
| H4N2F       | 1297.50            |                    |                        | ✓            | ✓    | ✓                |
| H5N2        | 1313.50            |                    |                        | ✓            | ✓    | ✓                |
| H3N2FS2     |                    |                    | 1315.33                | ✓            | ✓    | ✓                |
| H3N3F       | 1338.53            |                    |                        | ✓            | ✓    | ✓                |
| H4N3        | 1354.52            |                    |                        | ✓            | ✓    | ✓                |
| H3N3PC      | 1357.53            |                    |                        | ✓            | ✓    | ✓                |
| H3N2F2S     |                    | 1359.45            |                        |              | ✓    |                  |
| H3N3S2      |                    |                    | 1372.35                | ✓            | ✓    | ✓                |
| H3N4        | 1395.55            |                    |                        | ✓            | ✓    | ✓                |
| H3N3FS      |                    | 1416.47            |                        | ✓            | ✓    | ✓                |
| H4N3S       |                    | 1432.47            |                        | ✓            | ✓    |                  |
| H3N3PCS     |                    | 1435.47            |                        | ✓            | ✓    |                  |
| H3N4S       |                    | 1473.49            |                        | ✓            | ✓    | ✓                |
| H6N2        | 1475.55            |                    |                        | ✓            | ✓    | ✓                |
| H3N3F2      | 1484.59            |                    |                        |              | ✓    |                  |
| H5N2F       | 1459.56            |                    |                        | ✓            | ✓    | ✓                |
| H4N3F       | 1500.58            |                    |                        | ✓            | ✓    | ✓                |
| H3N3FPC     | 1503.59            |                    |                        | ✓            | ✓    | ✓                |
| H5N3        | 1516.58            |                    |                        | ✓            | ✓    | ✓                |
| H3N3FS2     |                    |                    | 1518.41                | ✓            | ✓    | ✓                |
| H4N3GlcA    | 1530.56            | 1528.54            |                        | ✓            |      | ✓                |
| H3N4F       | 1541.61            |                    |                        | ✓            | ✓    | ✓                |
| H3N4PC      | 1560.61            |                    |                        | ✓            | ✓    | ✓                |
| H3N3F2S     |                    | 1562.53            |                        |              | ✓    |                  |
| H3N4S2      |                    |                    | 1575.43                | ✓            | ✓    | ✓                |

| Composition  | [M+H] <sup>+</sup> | [M-H] <sup>-</sup> | [M-2H+Na] <sup>-</sup> | <i>T. ni</i> | Hi 5 | <i>L. dispar</i> |
|--------------|--------------------|--------------------|------------------------|--------------|------|------------------|
| H4N3FS       |                    | 1578.52            |                        | ✓            | ✓    | ✓                |
| H3N3FPCS     |                    | 1581.53            |                        | ✓            | ✓    |                  |
| H4N3GlcAS    |                    | 1608.50            |                        | ✓            |      | ✓                |
| H3N4FS       |                    | 1619.55            |                        | ✓            | ✓    |                  |
| H6N2F        | 1621.61            |                    |                        | ✓            | ✓    | ✓                |
| H7N2         | 1637.60            |                    |                        | ✓            | ✓    | ✓                |
| H3N4PCS      |                    | 1638.46            |                        | ✓            | ✓    |                  |
| H5N3F        | 1662.64            |                    |                        | ✓            | ✓    |                  |
| H4N3FPC      | 1665.64            |                    |                        | ✓            |      |                  |
| H4N3FGlcA    | 1676.61            | 1674.60            |                        | ✓            | ✓    | ✓                |
| H3N4F2       | 1687.67            |                    |                        |              | ✓    | ✓                |
| H3N4FPC      | 1706.66            |                    |                        | ✓            | ✓    | ✓                |
| H3N4FS2      |                    |                    | 1721.49                | ✓            | ✓    |                  |
| H4N4PC       | 1722.66            |                    |                        | ✓            |      |                  |
| H4N4GlcA     | 1733.64            | 1731.62            |                        | ✓            |      |                  |
| H3N5F        | 1744.69            |                    |                        | ✓            | ✓    |                  |
| H4N3FGlcAS   |                    | 1754.56            |                        | ✓            |      | ✓                |
| H3N5PC       | 1763.69            |                    |                        | ✓            |      |                  |
| H3N4F2S      |                    | 1765.61            |                        | ✓            | ✓    |                  |
| H4N4FS       |                    | 1781.60            |                        | ✓            | ✓    |                  |
| H7N2F        | 1783.66            |                    |                        | ✓            | ✓    |                  |
| H3N4FPCS     |                    | 1784.61            |                        | ✓            | ✓    | ✓                |
| H8N2         | 1799.66            |                    |                        | ✓            | ✓    | ✓                |
| H3N4PC2S     |                    | 1803.60            |                        |              | ✓    |                  |
| H5N3FPC      | 1827.69            |                    |                        | ✓            |      |                  |
| H3N5PCS      |                    | 1841.63            |                        | ✓            | ✓    |                  |
| H3N4F2PC     | 1852.72            |                    |                        | ✓            | ✓    | ✓                |
| H4N4FPC      | 1868.72            |                    |                        | ✓            |      |                  |
| H3N4FPC2     | 1871.72            |                    |                        |              | ✓    | ✓                |
| H4N4FGlcA    | 1879.69            | 1877.68            |                        | ✓            |      | ✓                |
| H4N4PCGlcA   | 1898.69            | 1896.68            |                        | ✓            | ✓    | ✓                |
| H3N5FPC      | 1909.74            |                    |                        | ✓            | ✓    | ✓                |
| H3N4F2PCS    |                    | 1930.66            |                        |              | ✓    |                  |
| H3N4FPC2S    |                    | 1949.66            |                        |              | ✓    |                  |
| H9N2         | 1961.71            |                    |                        | ✓            | ✓    | ✓                |
| H3N5FPCS     |                    | 1987.69            |                        | ✓            | ✓    | ✓                |
| H4N4FPCGlcA  | 2044.75            | 2042.73            |                        | ✓            | ✓    | ✓                |
| H3N5FPC2     | 2074.80            |                    |                        | ✓            |      |                  |
| H4N5FGlcA    | 2082.77            | 2080.76            |                        |              |      | ✓                |
| H4N5PCGlcA   | 2101.77            | 2099.76            |                        |              | ✓    | ✓                |
| H10N2        | 2123.76            |                    |                        | ✓            | ✓    | ✓                |
| H4N4F2PCGlcA | 2190.81            | 2188.79            |                        |              |      | ✓                |
| H4N5FPCGlcA  | 2247.83            | 2245.81            |                        | ✓            | ✓    | ✓                |
| H3N6FPC2     | 2277.88            |                    |                        | ✓            | ✓    | ✓                |
| H11N2        | 2285.81            |                    |                        | ✓            |      |                  |
| H4N5FPCGlcAS |                    | 2325.77            |                        |              |      | ✓                |
| H12N2        | 2447.69            |                    |                        | ✓            |      |                  |
| H4N6FPCGlcA  | 2450.91            | 2448.89            |                        |              |      | ✓                |
| H4N6FPC2GlcA | 2615.96            | 2613.95            |                        |              |      | ✓                |
